# Supplementary material for: THAP7-AS1 recruits the SWI/SNF to activate EGFR-ELK1 signaling and induce crosstalk between tumor-associated macrophages and breast cancer cells
Source: Research Square preprint supplement (doi:10.21203/rs.3.rs-1453689/v1), 2022-03-17
Supplement: Supplementary file 1 [file f52b04d7a2b357a753858804.docx]

**Supplementary Table 1: The target sequences of THAP7-AS1 Smart Silencer**

| The target sequences of THAP7-AS1 Smart Silencer |
| --- |
| 5’- AGAAATGGGAGCTCATTAA-3’ |
| 5’-TGCCCACATCTTCATAATC-3’, |
| 5’- TCAGAGCTGTGGACCAGTT-3’ |
| 5’- TAAGGCGCACTTGGCCGAAC-3’, |
| 5’- TAATGCCCACCTGTCAGAGA-3’, |
| 5’- TATATTGGCCTCAGAAATGG-3’ |

**Supplementary Table 2: The target sequences of SI-RNA**

|  | The target sequences of SI-RNA | |
| --- | --- | --- |
|  | sense（5'-3'） | antisense（5'-3'） |
| si-SNF2H | GCGACUGCUGAUGUAGUAATT | UUACUACAUCAGCAGUCGCTT |
| si-SNF2L | GCAUGAACUGUGGGCCUUATT | UAAGGCCCACAGUUCAUGCTT |
| si-BAF155 | GGAUCUAGAUGAGCAGGAUTT | AUCCUGCUCAUCUAGAUCCTT |
| si-P300 | CCGGUGAACUCUCCUAUAATT | UUAUAGGAGAGUUCACCGGTT |

**Supplementary Table 3. Sequences of EGFR ChIP primers.**

| Name | Sense primer | Antisense primer |
| --- | --- | --- |
| **Primers for ChIP** |  |  |
| EGFR-1 | 5' CCTCCTCCGCCGCCTGGTCC 3' | 5' TCGTCCGGTCTGGGCGGCGG 3' |
| EGFR-2 | 5' AGGGGCAGTGCTGGGAACGC 3' | 5' GGGATCGGGAGGAGCAGAGG 3' |
| EGFR-3 | 5' GGTGGGGACCCGAATAAAGG 3' | 5' CAGCACTGCCCCTCTGGACC 3' |
| EGFR-4 | 5' GGAGGCCTGTCTCTGCACCC 3' | 5' CCACCTCCCCTGCAGCACTA 3' |
| EGFR-5 | 5' AAGCTCAGTTTCTTTTGGCC 3' | 5' GTTTATTGCAACCAGCCATG 3' |
| EGFR-6 | 5' TGTGATTTTTGACAGAGCCG 3' | 5' GCCAAAAGAAACTGAGCTTT3' |
| EGFR-7 | 5' TCACAGGGAAGTTCCAGGTT 3' | 5' GATCTCTCGGCTCTGTCAAA 3' |
| EGFR-8 | 5' TTGTGCTTCCCATTTGCCTT 3' | 5' CCGCACAACCTGGAACTTCC 3' |
| EGFR-9 | 5' TGCTGTCTTTTTGGGCACTC 3' | 5' GCAAATGGGAAGCACAACAG 3' |
| EGFR-10 | 5' CCATTCTTCTCTGTTCCCTG 3' | 5' TTGAGTGCCCAAAAAGACAG 3' |

**Supplementary Table 4. Sequences of THAP7-AS1 ChIP primers.**

| Name | Sense primer | Antisense primer |
| --- | --- | --- |
| **Primers for ChIP** |  |  |
| P300-1 | 5' TCTTGGGAAGTCTGTGGAGC 3' | 5' GGGTCTGCGTTTCCCCTC 3' |
| P300-2 | 5' GGAAACGCAGACCCAACAC 3' | 5' CGGGCGGTGGTGCTTAC 3' |
| P300-3 | 5' GGGCACAGACGAGGCAA 3' | 5' CGCCCCACTCTGTTACCTG 3' |
| P300-4 | 5' AAGCAGTTTCCTCAGCGTCA 3' | 5' CATGCGCTAGTTGTTGCTCG 3' |
| P300-5 | 5' CCTCGGGTTGTCCTTCTTGG 3' | 5' CTCCGTTGCCTCGTCTGTG 3' |
| P300-6 | 5' GAGACCTCCCTGCGACCC 3' | 5' GCCCCACTCTGTTACCTGC3' |
| P300-7 | 5' ATCTGGCAGGTAACAGAGTGG 3' | 5' TAGTTGTTGCTCGCCTCGG 3' |
| c-MYC | 5' CTCCCACCCACAGGTTCAAG 3' | 5' GGCATCTCCTTCCACAGGTC 3' |
| c-JUN-1 | 5' GAAACGCAGACCCAACACG 3' | 5' CTGAATGCAGTCGGGAAGGG 3' |
| c-JUN-2 | 5' CTCCCACCCACAGGTTCAAG 3' | 5' AACCGCGGCATCTCCTTC 3' |
| c-JUN-3 | 5' GAAGGAGATGCCGCGGTT 3' | 5' CTTTCCCAGATGCCGCGT 3' |
